# Supplementary material for: Novel phospholyl(diphenylphosphino)methane-ruthenium complexes: unexpected non-assisted cis to trans isomerization of [RuCl2(κ2-P–P′)2]
Source: Royal Society of Chemistry journal article supplement (doi:10.1039/c2dt32032k), 2012-11-07
Supplement: c2dt32032k.pdf [file c2dt32032k.pdf]

Novel Phospholyl(diphenylphosphino)methane-ruthenium Complexes:  
Unexpected non-assisted *cis* to *trans* Isomerization of  $[\text{RuCl}_2(\kappa^2\text{-P-P}')_2]$ .<sup>a</sup>

Duc Hanh Nguyen, Jean-Claude Daran, Sonia Ladeira, Thomas Davin, Laurent Maron  
Martine Urrutigoity, Philippe Kalck, and Maryse Gouygou

Supporting Informations

X-ray data

Computational data

X-ray data

**Table 1.** Crystal data for **3** and **4**.

| Identification code                   | <b>3</b>                                                                                           | <b>4</b>                                                          |
|---------------------------------------|----------------------------------------------------------------------------------------------------|-------------------------------------------------------------------|
| Empirical formula                     | C <sub>50</sub> H <sub>40</sub> Cl <sub>2</sub> P <sub>4</sub> Ru, CH <sub>2</sub> Cl <sub>2</sub> | C <sub>50</sub> H <sub>40</sub> Cl <sub>2</sub> P <sub>4</sub> Ru |
| Formula weight                        | 1021.60                                                                                            | 936.68                                                            |
| Temperature, K                        | 180(2)                                                                                             | 180(2)                                                            |
| Wavelength, Å                         | 0.71073                                                                                            | 0.71073                                                           |
| Crystal system                        | Tetragonal                                                                                         | Triclinic                                                         |
| Space group                           | I 41/a                                                                                             | P -1                                                              |
| a, Å                                  | 25.8002(14)                                                                                        | 10.0456(3)                                                        |
| b, Å                                  | 25.8002(14)                                                                                        | 10.8211(4)                                                        |
| c, Å                                  | 35.4669(18)                                                                                        | 11.5003(4)                                                        |
| α, °                                  | 90                                                                                                 | 103.090(3)                                                        |
| β, °                                  | 90                                                                                                 | 94.498(3)                                                         |
| γ, °                                  | 90                                                                                                 | 117.213(4)                                                        |
| Volume, Å <sup>3</sup>                | 23609(2)                                                                                           | 1058.70(6)                                                        |
| Z                                     | 16                                                                                                 | 1                                                                 |
| Density (calc), Mg/m <sup>3</sup>     | 1.15                                                                                               | 1.469                                                             |
| Abs. coefficient, mm <sup>-1</sup>    | 0.583                                                                                              | 0.683                                                             |
| F(000)                                | 8320                                                                                               | 478                                                               |
| Crystal size, mm <sup>3</sup>         | 0.4 x 0.08 x 0.08                                                                                  | 0.25 x 0.20 x 0.10                                                |
| Theta range, °                        | 0.98 to 25.35.                                                                                     | 3.27 to 27.48                                                     |
| Reflections collected                 | 155458                                                                                             | 23232                                                             |
| Indpt reflections (R <sub>int</sub> ) | 10818 ( 0.141)                                                                                     | 4800 (0.0262)                                                     |
| Completeness, %                       | 100.0                                                                                              | 99.3                                                              |
| Absorption correction                 | Multi-scan                                                                                         | Multi-scan                                                        |
| Max. and min. transmission            | 0.954 and 0.946                                                                                    | 1.0 and 0.951                                                     |

| Refinement method                   | F <sup>2</sup>    | F <sup>2</sup> |
|-------------------------------------|-------------------|----------------|
| Data /restraints/parameters         | 10818 / 204 / 580 | 4800 / 0 / 259 |
| Goodness-of-fit on F <sup>2</sup>   | 0.984             | 1.070          |
| R1, wR2 [I>2σ(I)]                   | 0.0585, 0.1351    | 0.0216, 0.0552 |
| R1, wR2 (all data)                  | 0.1086, 0.1492    | 0.0262, 0.0561 |
| Residual density, e.Å <sup>-3</sup> | 0.503 and -0.559  | 0.401 / -0.375 |

---

### Computational data.

Complex Ru, Cl in trans phosphole in trans, 1:

E : -4309.3426

G : -4308.6769

H : -4308.5340

|    |           |          |          |
|----|-----------|----------|----------|
| Ru | 2.097614  | 3.115373 | 5.475708 |
| Cl | 2.356039  | 1.001143 | 4.266461 |
| P  | 0.175604  | 3.411211 | 4.157942 |
| P  | 0.286650  | 2.100193 | 6.596520 |
| C  | -0.889246 | 4.896263 | 4.100221 |
| C  | -1.363410 | 5.130535 | 2.791864 |
| C  | -0.909244 | 4.130294 | 1.813344 |
| C  | -0.086358 | 3.129062 | 2.369700 |
| C  | -0.773540 | 2.078659 | 5.062139 |
| H  | -0.534309 | 1.137885 | 4.553262 |
| H  | -1.859574 | 2.186951 | 5.137860 |
| C  | -1.215846 | 5.763567 | 5.141490 |
| H  | -0.813392 | 5.600428 | 6.135519 |
| C  | -2.041228 | 6.859354 | 4.879991 |
| H  | -2.301405 | 7.539936 | 5.686430 |
| C  | -2.520928 | 7.090403 | 3.589587 |
| H  | -3.158967 | 7.949064 | 3.395065 |
| C  | -2.182441 | 6.234253 | 2.543218 |
| H  | -2.556062 | 6.429534 | 1.541237 |
| C  | 0.418144  | 2.098765 | 1.577450 |
| H  | 1.058790  | 1.342659 | 2.022864 |
| C  | 0.097319  | 2.066639 | 0.218792 |

|    |           |           |           |
|----|-----------|-----------|-----------|
| H  | 0.483088  | 1.265337  | -0.406295 |
| C  | -0.713566 | 3.057317  | -0.338871 |
| H  | -0.956291 | 3.025631  | -1.398184 |
| C  | -1.216818 | 4.088871  | 0.451121  |
| H  | -1.847929 | 4.853248  | 0.004893  |
| C  | -0.656106 | 3.012598  | 7.881492  |
| C  | -1.999939 | 3.381466  | 7.757654  |
| H  | -2.550754 | 3.168944  | 6.846487  |
| C  | -2.654815 | 4.037041  | 8.801821  |
| H  | -3.699075 | 4.317693  | 8.688482  |
| C  | -1.974783 | 4.327316  | 9.981744  |
| H  | -2.485621 | 4.836558  | 10.795142 |
| C  | -0.633221 | 3.966384  | 10.112716 |
| H  | -0.092201 | 4.196803  | 11.026897 |
| C  | 0.022840  | 3.320968  | 9.069463  |
| H  | 1.072104  | 3.058762  | 9.174191  |
| C  | 0.258207  | 0.390131  | 7.271242  |
| C  | -0.923232 | -0.153791 | 7.795868  |
| H  | -1.832836 | 0.441396  | 7.821750  |
| C  | -0.935459 | -1.449365 | 8.304703  |
| H  | -1.856522 | -1.862233 | 8.708923  |
| C  | 0.234093  | -2.211399 | 8.303713  |
| H  | 0.224698  | -3.221604 | 8.705877  |
| C  | 1.412027  | -1.674714 | 7.788967  |
| H  | 2.325844  | -2.263196 | 7.783809  |
| C  | 1.426465  | -0.379330 | 7.271178  |
| H  | 2.335791  | 0.028312  | 6.842212  |
| Cl | 1.839201  | 5.229594  | 6.684972  |
| P  | 4.019614  | 2.819563  | 6.793489  |
| P  | 3.908576  | 4.130554  | 4.354891  |
| C  | 5.084465  | 1.334513  | 6.851274  |
| C  | 5.558611  | 1.100288  | 8.159646  |
| C  | 5.104429  | 2.100562  | 9.138126  |
| C  | 4.281549  | 3.101771  | 8.581723  |
| C  | 4.968767  | 4.152095  | 5.889272  |
| H  | 4.729540  | 5.092878  | 6.398134  |
| H  | 6.054801  | 4.043797  | 5.813553  |
| C  | 5.411080  | 0.467171  | 5.810041  |
| H  | 5.008640  | 0.630272  | 4.816001  |
| C  | 6.236463  | -0.628604 | 6.071591  |
| H  | 6.496653  | -1.309215 | 5.265180  |
| C  | 6.716145  | -0.859606 | 7.362010  |
| H  | 7.354184  | -1.718258 | 7.556571  |

|   |          |           |           |
|---|----------|-----------|-----------|
| C | 6.377642 | -0.003420 | 8.408343  |
| H | 6.751249 | -0.198664 | 9.410337  |
| C | 3.777027 | 4.132094  | 9.373926  |
| H | 3.136385 | 4.888181  | 8.928474  |
| C | 4.097828 | 4.164270  | 10.732588 |
| H | 3.712044 | 4.965591  | 11.357641 |
| C | 4.908709 | 3.173614  | 11.290299 |
| H | 5.151415 | 3.205339  | 12.349616 |
| C | 5.411980 | 2.142034  | 10.500353 |
| H | 6.043085 | 1.377675  | 10.946619 |
| C | 4.851334 | 3.218150  | 3.069919  |
| C | 6.195169 | 2.849288  | 3.193754  |
| H | 6.745986 | 3.061813  | 4.104918  |
| C | 6.850045 | 2.193715  | 2.149585  |
| H | 7.894307 | 1.913068  | 2.262922  |
| C | 6.170012 | 1.903437  | 0.969664  |
| H | 6.680849 | 1.394197  | 0.156265  |
| C | 4.828447 | 2.264364  | 0.838695  |
| H | 4.287426 | 2.033943  | -0.075484 |
| C | 4.172387 | 2.909778  | 1.881950  |
| H | 3.123122 | 3.171981  | 1.777223  |
| C | 3.937017 | 5.840612  | 3.680162  |
| C | 5.118456 | 6.384534  | 3.155536  |
| H | 6.028062 | 5.789349  | 3.129662  |
| C | 5.130682 | 7.680105  | 2.646695  |
| H | 6.051746 | 8.092973  | 2.242476  |
| C | 3.961129 | 8.442136  | 2.647675  |
| H | 3.970522 | 9.452339  | 2.245505  |
| C | 2.783194 | 7.905450  | 3.162419  |
| H | 1.869375 | 8.493930  | 3.167569  |
| C | 2.768757 | 6.610069  | 3.680215  |
| H | 1.859430 | 6.202426  | 4.109178  |

Complex Ru, Cl I ntrans, phosphole in cis, **2**:

E: -4309.3404

G: -4308.6721

H: -4308.5314

|    |          |          |          |
|----|----------|----------|----------|
| Ru | 2.511572 | 4.130591 | 4.148095 |
| Cl | 2.736708 | 1.998697 | 2.946230 |
| P  | 0.734707 | 4.529571 | 2.684798 |
| P  | 0.555770 | 3.173094 | 5.089826 |

|   |           |           |           |
|---|-----------|-----------|-----------|
| C | -0.274382 | 6.049840  | 2.580193  |
| C | -0.606675 | 6.343314  | 1.241192  |
| C | -0.072954 | 5.371020  | 0.274398  |
| C | 0.661006  | 4.324280  | 0.870277  |
| C | -0.357960 | 3.227313  | 3.462806  |
| H | -0.135518 | 2.282343  | 2.955080  |
| H | -1.435816 | 3.412382  | 3.448000  |
| C | -0.702746 | 6.875867  | 3.617102  |
| H | -0.415382 | 6.662406  | 4.640776  |
| C | -1.480702 | 7.996009  | 3.317355  |
| H | -1.818362 | 8.645737  | 4.120578  |
| C | -1.815131 | 8.289930  | 1.994430  |
| H | -2.417065 | 9.167266  | 1.770210  |
| C | -1.380189 | 7.470436  | 0.954692  |
| H | -1.644912 | 7.711025  | -0.071808 |
| C | 1.238305  | 3.323285  | 0.091658  |
| H | 1.814850  | 2.535751  | 0.567722  |
| C | 1.071998  | 3.360298  | -1.293976 |
| H | 1.518579  | 2.584079  | -1.909914 |
| C | 0.343548  | 4.391345  | -1.890212 |
| H | 0.222265  | 4.413849  | -2.970493 |
| C | -0.227344 | 5.397633  | -1.113531 |
| H | -0.787889 | 6.197511  | -1.590733 |
| C | -0.467914 | 4.100935  | 6.299311  |
| C | -1.841568 | 4.325344  | 6.145576  |
| H | -2.359959 | 3.992776  | 5.250689  |
| C | -2.566880 | 4.986501  | 7.136492  |
| H | -3.632400 | 5.155431  | 7.001380  |
| C | -1.927410 | 5.428232  | 8.293262  |
| H | -2.493089 | 5.943959  | 9.065367  |
| C | -0.558461 | 5.214636  | 8.452154  |
| H | -0.048883 | 5.568476  | 9.344494  |
| C | 0.169354  | 4.562713  | 7.459932  |
| H | 1.240142  | 4.425733  | 7.577612  |
| C | 0.387493  | 1.447067  | 5.703814  |
| C | -0.871471 | 0.859238  | 5.886961  |
| H | -1.774878 | 1.423471  | 5.669070  |
| C | -0.977584 | -0.444545 | 6.363806  |
| H | -1.959225 | -0.891583 | 6.500211  |
| C | 0.172978  | -1.172258 | 6.671484  |
| H | 0.089132  | -2.189462 | 7.046078  |
| C | 1.427573  | -0.592066 | 6.497993  |
| H | 2.327500  | -1.155058 | 6.732747  |

|    |           |            |            |
|----|-----------|------------|------------|
| C  | 1. 534404 | 0. 711017  | 6. 012603  |
| H  | 2. 509396 | 1. 159016  | 5. 853553  |
| Cl | 2. 205681 | 6. 262862  | 5. 312767  |
| P  | 4. 350840 | 5. 148936  | 3. 145917  |
| P  | 4. 371768 | 3. 910476  | 5. 629093  |
| C  | 4. 454337 | 6. 781293  | 2. 330959  |
| C  | 5. 286977 | 6. 728025  | 1. 194081  |
| C  | 5. 862589 | 5. 396387  | 0. 947433  |
| C  | 5. 467221 | 4. 426803  | 1. 892491  |
| C  | 5. 328774 | 5. 249975  | 4. 742249  |
| H  | 5. 102188 | 6. 222846  | 5. 187850  |
| H  | 6. 411274 | 5. 109886  | 4. 666188  |
| C  | 3. 810985 | 7. 962990  | 2. 692304  |
| H  | 3. 153993 | 7. 974651  | 3. 557355  |
| C  | 4. 015154 | 9. 109304  | 1. 921950  |
| H  | 3. 517749 | 10. 036519 | 2. 194381  |
| C  | 4. 845546 | 9. 066622  | 0. 800341  |
| H  | 4. 996079 | 9. 963419  | 0. 204252  |
| C  | 5. 479364 | 7. 881720  | 0. 430589  |
| H  | 6. 116695 | 7. 860513  | -0. 449776 |
| C  | 5. 905273 | 3. 109436  | 1. 785541  |
| H  | 5. 565651 | 2. 360484  | 2. 492470  |
| C  | 6. 764378 | 2. 759545  | 0. 742050  |
| H  | 7. 111460 | 1. 733570  | 0. 651935  |
| C  | 7. 167477 | 3. 717034  | -0. 190124 |
| H  | 7. 832867 | 3. 434800  | -1. 002378 |
| C  | 6. 717284 | 5. 032515  | -0. 095456 |
| H  | 7. 031295 | 5. 766821  | -0. 832935 |
| C  | 5. 586028 | 2. 521504  | 5. 691581  |
| C  | 6. 813048 | 2. 699556  | 6. 351827  |
| H  | 7. 036571 | 3. 646649  | 6. 837706  |
| C  | 7. 743434 | 1. 666743  | 6. 406450  |
| H  | 8. 689429 | 1. 818653  | 6. 920385  |
| C  | 7. 459869 | 0. 437400  | 5. 807053  |
| H  | 8. 186652 | -0. 370048 | 5. 852027  |
| C  | 6. 245718 | 0. 251499  | 5. 152265  |
| H  | 6. 019821 | -0. 700907 | 4. 678898  |
| C  | 5. 310307 | 1. 287939  | 5. 091553  |
| H  | 4. 378855 | 1. 152429  | 4. 547834  |
| C  | 4. 290670 | 4. 353700  | 7. 416371  |
| C  | 4. 325829 | 5. 675143  | 7. 877513  |
| H  | 4. 420145 | 6. 496968  | 7. 177400  |
| C  | 4. 210408 | 5. 951808  | 9. 239733  |

|   |           |           |            |
|---|-----------|-----------|------------|
| H | 4. 244829 | 6. 983882 | 9. 579565  |
| C | 4. 044854 | 4. 917260 | 10. 158127 |
| H | 3. 954125 | 5. 136534 | 11. 219066 |
| C | 3. 996009 | 3. 598077 | 9. 707903  |
| H | 3. 866488 | 2. 782307 | 10. 414691 |
| C | 4. 119955 | 3. 318660 | 8. 349066  |
| H | 4. 094007 | 2. 284840 | 8. 014341  |

Complex Ru, Cl cis, Phosphole trans, **3**:

E: -4309.3294

G: -4308.6600

H: -4308.5205

|    |            |           |            |
|----|------------|-----------|------------|
| C  | 17. 538585 | 5. 908987 | 19. 393644 |
| P  | 17. 742241 | 5. 146915 | 21. 059681 |
| C  | 19. 477344 | 4. 533796 | 20. 839955 |
| C  | 19. 771663 | 3. 766596 | 19. 701089 |
| C  | 21. 059925 | 3. 291594 | 19. 473214 |
| C  | 22. 084271 | 3. 574564 | 20. 378367 |
| C  | 21. 805358 | 4. 332382 | 21. 513159 |
| C  | 20. 512772 | 4. 808645 | 21. 742049 |
| C  | 18. 433197 | 6. 903430 | 18. 975548 |
| C  | 18. 316048 | 7. 470628 | 17. 709170 |
| C  | 17. 313606 | 7. 036686 | 16. 841104 |
| C  | 16. 426402 | 6. 042435 | 17. 248162 |
| C  | 16. 531997 | 5. 486256 | 18. 522321 |
| Ru | 15. 940272 | 4. 220070 | 22. 225881 |
| Cl | 13. 933895 | 4. 056411 | 23. 626520 |
| C  | 17. 896385 | 6. 571144 | 22. 261114 |
| P  | 16. 961587 | 5. 750739 | 23. 658785 |
| C  | 18. 178615 | 5. 458883 | 24. 995344 |
| C  | 17. 962384 | 6. 339453 | 26. 076161 |
| C  | 18. 801282 | 6. 277490 | 27. 191418 |
| C  | 19. 838730 | 5. 347694 | 27. 227796 |
| C  | 20. 039655 | 4. 466903 | 26. 163995 |
| C  | 19. 201379 | 4. 516457 | 25. 048220 |
| C  | 16. 815284 | 7. 240098 | 25. 880686 |
| C  | 16. 158886 | 7. 056752 | 24. 647232 |
| C  | 15. 025153 | 7. 795824 | 24. 319858 |
| C  | 14. 559499 | 8. 750819 | 25. 225309 |
| C  | 15. 213963 | 8. 951437 | 26. 442322 |
| C  | 16. 337092 | 8. 197513 | 26. 777758 |
| Cl | 14. 801584 | 6. 150546 | 21. 229569 |



|   |            |            |            |
|---|------------|------------|------------|
| P | 16. 334878 | 2. 096302  | 23. 123330 |
| C | 14. 925699 | 1. 330210  | 22. 163539 |
| P | 14. 910047 | 2. 643402  | 20. 834225 |
| C | 15. 541193 | 1. 811835  | 19. 331285 |
| C | 14. 522152 | 1. 667763  | 18. 366691 |
| C | 14. 815332 | 1. 054012  | 17. 145951 |
| C | 16. 104654 | 0. 586107  | 16. 899480 |
| C | 17. 107888 | 0. 725911  | 17. 860699 |
| C | 16. 828577 | 1. 344796  | 19. 080602 |
| C | 13. 223774 | 2. 210085  | 18. 799826 |
| C | 13. 247139 | 2. 758229  | 20. 098794 |
| C | 12. 116277 | 3. 356362  | 20. 649087 |
| C | 10. 935008 | 3. 371899  | 19. 905601 |
| C | 10. 896537 | 2. 812952  | 18. 626202 |
| C | 12. 035912 | 2. 238024  | 18. 065777 |
| C | 17. 728428 | 0. 946000  | 22. 733718 |
| C | 18. 978059 | 1. 426348  | 22. 339887 |
| C | 20. 035343 | 0. 546414  | 22. 092461 |
| C | 19. 847452 | -0. 825357 | 22. 233040 |
| C | 18. 601773 | -1. 317499 | 22. 629835 |
| C | 17. 553432 | -0. 439281 | 22. 884200 |
| C | 16. 104057 | 1. 666398  | 24. 905027 |
| C | 17. 240523 | 1. 524471  | 25. 714143 |
| C | 17. 117592 | 1. 223791  | 27. 068453 |
| C | 15. 855808 | 1. 049031  | 27. 633850 |
| C | 14. 720617 | 1. 184076  | 26. 837334 |
| C | 14. 840151 | 1. 497197  | 25. 484311 |
| H | 18. 647537 | 6. 947993  | 28. 032933 |
| H | 17. 254753 | 7. 369907  | 21. 874352 |
| H | 13. 999256 | 1. 440217  | 22. 733253 |
| H | 14. 515110 | 7. 610670  | 23. 378808 |
| H | 13. 674431 | 9. 333301  | 24. 983325 |
| H | 14. 839734 | 9. 695247  | 27. 141495 |
| H | 16. 828273 | 8. 353596  | 27. 734968 |
| H | 20. 489755 | 5. 303273  | 28. 097328 |
| H | 20. 842042 | 3. 734828  | 26. 206872 |
| H | 19. 343685 | 3. 814619  | 24. 231349 |
| H | 18. 890801 | 6. 968771  | 22. 483244 |
| H | 20. 326807 | 5. 396894  | 22. 634905 |
| H | 22. 595258 | 4. 566781  | 22. 222557 |
| H | 23. 093073 | 3. 213420  | 20. 194894 |
| H | 21. 267070 | 2. 707949  | 18. 579675 |
| H | 19. 009897 | 8. 248158  | 17. 399207 |

|   |            |            |            |
|---|------------|------------|------------|
| H | 17. 223191 | 7. 476644  | 15. 850964 |
| H | 15. 637109 | 5. 706631  | 16. 580694 |
| H | 15. 814858 | 4. 742838  | 18. 850996 |
| H | 17. 608896 | 1. 456510  | 19. 828395 |
| H | 18. 109005 | 0. 353289  | 17. 659882 |
| H | 16. 329223 | 0. 107531  | 15. 949513 |
| H | 14. 043632 | 0. 936645  | 16. 389424 |
| H | 19. 125007 | 2. 492984  | 22. 213972 |
| H | 20. 999207 | 0. 942529  | 21. 785676 |
| H | 20. 667003 | -1. 512571 | 22. 037763 |
| H | 18. 449914 | -2. 387632 | 22. 747080 |
| H | 18. 011124 | 1. 122300  | 27. 679209 |
| H | 15. 758005 | 0. 809550  | 28. 689823 |
| H | 13. 731425 | 1. 054585  | 27. 269059 |
| H | 13. 944906 | 1. 638023  | 24. 891064 |
| H | 15. 054388 | 0. 297976  | 21. 826209 |
| H | 11. 994814 | 1. 820137  | 17. 062983 |
| H | 9. 971872  | 2. 835258  | 18. 054685 |
| H | 10. 043701 | 3. 833438  | 20. 322284 |
| H | 12. 174107 | 3. 810991  | 21. 634134 |
| H | 16. 597053 | -0. 833800 | 23. 219171 |
| H | 18. 231634 | 1. 639614  | 25. 285469 |
| H | 18. 990400 | 3. 556948  | 18. 975138 |
| H | 19. 230222 | 7. 234124  | 19. 637870 |

Complex Ru, Cl cis, Phosphine trans, **4**:

E: -4309. 3438

G: -4308. 6734

H: -4308. 5345

|   |            |           |            |
|---|------------|-----------|------------|
| P | 16. 868953 | 1. 956694 | 23. 245762 |
| C | 16. 295992 | 3. 626497 | 22. 737283 |
| C | 15. 106893 | 4. 152636 | 23. 252333 |
| H | 14. 528721 | 3. 571881 | 23. 963529 |
| C | 14. 675588 | 5. 415666 | 22. 844752 |
| H | 13. 750846 | 5. 819494 | 23. 248988 |
| C | 15. 417616 | 6. 152028 | 21. 924278 |
| H | 15. 074494 | 7. 134171 | 21. 607643 |
| C | 16. 605711 | 5. 629792 | 21. 409674 |
| H | 17. 191191 | 6. 202402 | 20. 694425 |
| C | 17. 046617 | 4. 374587 | 21. 818449 |
| H | 17. 982896 | 3. 981978 | 21. 428103 |
| C | 18. 628633 | 2. 293057 | 23. 658620 |

|   |            |            |            |
|---|------------|------------|------------|
| C | 19. 711689 | 1. 976465  | 22. 829889 |
| H | 19. 554681 | 1. 466734  | 21. 884197 |
| C | 21. 014067 | 2. 304270  | 23. 210058 |
| H | 21. 843993 | 2. 051710  | 22. 554590 |
| C | 21. 249021 | 2. 953225  | 24. 419963 |
| H | 22. 264018 | 3. 207761  | 24. 714594 |
| C | 20. 175917 | 3. 274210  | 25. 252097 |
| H | 20. 348804 | 3. 773410  | 26. 201615 |
| C | 18. 876825 | 2. 946588  | 24. 875060 |
| H | 18. 045389 | 3. 199551  | 25. 527132 |
| C | 16. 851508 | 0. 910583  | 21. 706710 |
| H | 17. 724147 | 0. 888611  | 21. 047899 |
| H | 15. 965596 | 1. 222317  | 21. 143340 |
| C | 17. 948774 | -1. 672639 | 22. 461861 |
| C | 19. 166087 | -1. 455811 | 23. 100512 |
| H | 19. 276256 | -0. 644242 | 23. 812779 |
| C | 20. 246499 | -2. 295824 | 22. 825330 |
| H | 21. 198090 | -2. 129796 | 23. 322656 |
| C | 20. 099846 | -3. 355726 | 21. 929179 |
| H | 20. 942526 | -4. 011306 | 21. 723700 |
| C | 18. 880907 | -3. 582277 | 21. 292647 |
| H | 18. 781954 | -4. 407709 | 20. 592239 |
| C | 17. 798593 | -2. 736843 | 21. 549946 |
| C | 16. 465653 | -2. 794455 | 20. 930267 |
| C | 16. 021510 | -3. 724639 | 19. 986987 |
| H | 16. 674085 | -4. 528126 | 19. 654782 |
| C | 14. 734822 | -3. 615513 | 19. 463763 |
| H | 14. 392227 | -4. 337595 | 18. 726541 |
| C | 13. 887761 | -2. 583178 | 19. 873204 |
| H | 12. 888498 | -2. 501467 | 19. 453196 |
| C | 14. 317006 | -1. 651764 | 20. 820575 |
| H | 13. 669171 | -0. 845674 | 21. 154231 |
| C | 15. 602056 | -1. 761744 | 21. 349047 |
| C | 11. 870238 | -1. 772582 | 27. 064984 |
| H | 12. 408189 | -2. 644155 | 27. 430736 |
| C | 10. 566385 | -1. 543212 | 27. 494331 |
| H | 10. 101637 | -2. 226654 | 28. 200874 |
| C | 9. 857650  | -0. 441863 | 27. 011199 |
| H | 8. 837416  | -0. 264746 | 27. 343333 |
| C | 10. 457578 | 0. 426293  | 26. 101972 |
| H | 9. 908622  | 1. 284079  | 25. 721930 |
| C | 11. 767679 | 0. 207625  | 25. 673984 |
| H | 12. 241629 | 0. 884901  | 24. 971079 |

|    |            |            |            |
|----|------------|------------|------------|
| C  | 14. 158034 | -2. 976206 | 25. 188279 |
| C  | 14. 577838 | -4. 004451 | 26. 041183 |
| H  | 15. 003216 | -3. 777056 | 27. 013999 |
| C  | 14. 462740 | -5. 339729 | 25. 652334 |
| H  | 14. 794800 | -6. 125544 | 26. 326448 |
| C  | 13. 924164 | -5. 663966 | 24. 409006 |
| H  | 13. 836117 | -6. 704628 | 24. 107198 |
| C  | 13. 499870 | -4. 647095 | 23. 553292 |
| H  | 13. 084282 | -4. 888055 | 22. 578666 |
| C  | 13. 616140 | -3. 314587 | 23. 939447 |
| H  | 13. 285784 | -2. 528263 | 23. 266635 |
| C  | 17. 967587 | -1. 728623 | 26. 306226 |
| C  | 17. 906458 | -2. 963757 | 25. 667095 |
| H  | 17. 093030 | -3. 192927 | 24. 985965 |
| C  | 18. 904790 | -3. 910270 | 25. 902773 |
| H  | 18. 859259 | -4. 875820 | 25. 406737 |
| C  | 19. 966397 | -3. 611999 | 26. 758451 |
| H  | 20. 745322 | -4. 350297 | 26. 932628 |
| C  | 20. 036500 | -2. 374685 | 27. 395783 |
| H  | 20. 864185 | -2. 157924 | 28. 066354 |
| C  | 19. 031908 | -1. 427693 | 27. 180312 |
| C  | 18. 915475 | -0. 104768 | 27. 812912 |
| C  | 19. 804122 | 0. 463985  | 28. 728785 |
| H  | 20. 706979 | -0. 065056 | 29. 023208 |
| C  | 19. 524903 | 1. 714973  | 29. 274593 |
| H  | 20. 214679 | 2. 154093  | 29. 991285 |
| C  | 18. 363980 | 2. 402737  | 28. 914305 |
| H  | 18. 149924 | 3. 374251  | 29. 352512 |
| C  | 17. 472793 | 1. 849431  | 27. 992888 |
| H  | 16. 568135 | 2. 373757  | 27. 697865 |
| C  | 17. 751741 | 0. 599558  | 27. 442636 |
| C  | 15. 271368 | -1. 021779 | 27. 134293 |
| H  | 14. 843735 | -0. 193122 | 27. 708170 |
| H  | 15. 439372 | -1. 882966 | 27. 787113 |
| C  | 12. 480308 | -0. 895000 | 26. 156701 |
| Cl | 14. 640548 | 2. 036371  | 26. 043090 |
| Cl | 13. 739454 | 1. 051827  | 22. 855291 |
| Ru | 15. 530613 | 0. 392877  | 24. 425210 |
| P  | 16. 413027 | -0. 678301 | 22. 587583 |
| P  | 16. 759260 | -0. 350272 | 26. 227741 |
| P  | 14. 210553 | -1. 188092 | 25. 613267 |

Complex Ru, Cl cis, Phosphole cis, **5**:

E: -4309.3316

G: -4308.6626

H: -4308.5224

|    |           |           |           |
|----|-----------|-----------|-----------|
| H  | 21.819057 | 6.129009  | 26.301300 |
| C  | 19.920796 | 5.925785  | 25.308665 |
| P  | 17.329211 | 5.674686  | 24.092359 |
| C  | 18.123679 | 6.497441  | 22.618858 |
| H  | 17.381064 | 7.206417  | 22.239101 |
| Ru | 16.341162 | 4.009643  | 22.698565 |
| P  | 18.070460 | 4.982792  | 21.524571 |
| C  | 19.864718 | 4.582743  | 21.397039 |
| C  | 20.352844 | 4.828373  | 20.098182 |
| C  | 21.709118 | 4.630671  | 19.821356 |
| C  | 22.567036 | 4.206290  | 20.833651 |
| C  | 22.082885 | 3.977140  | 22.123481 |
| C  | 20.728801 | 4.163268  | 22.406632 |
| C  | 20.835138 | 5.667109  | 26.330328 |
| C  | 20.485798 | 4.827419  | 27.386357 |
| C  | 19.220636 | 4.240303  | 27.413738 |
| C  | 18.309865 | 4.489211  | 26.389811 |
| C  | 18.648670 | 5.339999  | 25.327105 |
| C  | 16.387213 | 7.004829  | 24.947541 |
| C  | 14.991464 | 6.955433  | 25.023507 |
| C  | 14.295150 | 7.983879  | 25.659554 |
| C  | 14.978576 | 9.063787  | 26.213247 |
| C  | 16.371258 | 9.116592  | 26.138890 |
| C  | 17.072799 | 8.089502  | 25.514259 |
| C  | 19.323666 | 5.312790  | 19.166419 |
| C  | 18.055937 | 5.479678  | 19.760896 |
| C  | 16.971237 | 5.924563  | 19.007524 |
| C  | 17.158475 | 6.221715  | 17.656682 |
| C  | 18.413071 | 6.064955  | 17.064516 |
| C  | 19.496471 | 5.608923  | 17.812368 |
| P  | 16.894681 | 1.815132  | 23.361241 |
| C  | 18.240216 | 0.708217  | 22.727278 |
| C  | 19.278591 | 1.184789  | 21.929070 |
| C  | 20.255531 | 0.319583  | 21.429387 |
| C  | 20.194648 | -1.040090 | 21.717303 |

|    |            |            |            |
|----|------------|------------|------------|
| C  | 19. 154631 | -1. 532396 | 22. 509470 |
| C  | 18. 188803 | -0. 667035 | 23. 012989 |
| C  | 15. 438940 | 1. 088197  | 22. 434288 |
| P  | 15. 264736 | 2. 526254  | 21. 251368 |
| C  | 13. 524839 | 2. 643823  | 20. 713272 |
| C  | 13. 378270 | 2. 230553  | 19. 373959 |
| C  | 12. 114478 | 2. 261526  | 18. 780459 |
| C  | 11. 019417 | 2. 707020  | 19. 518274 |
| C  | 11. 176870 | 3. 132339  | 20. 838799 |
| C  | 12. 434848 | 3. 110330  | 21. 443275 |
| C  | 14. 641189 | 1. 817207  | 18. 742637 |
| C  | 15. 758614 | 1. 915941  | 19. 597787 |
| C  | 17. 029220 | 1. 581081  | 19. 140807 |
| C  | 17. 192860 | 1. 126505  | 17. 831296 |
| C  | 16. 089300 | 1. 020273  | 16. 983866 |
| C  | 14. 816113 | 1. 366435  | 17. 432314 |
| Cl | 14. 456073 | 3. 594766  | 24. 244887 |
| Cl | 15. 030646 | 5. 887707  | 21. 816512 |
| C  | 18. 027927 | 1. 055463  | 25. 805351 |
| C  | 18. 032023 | 0. 599966  | 27. 121857 |
| C  | 16. 831130 | 0. 284136  | 27. 756489 |
| C  | 15. 629232 | 0. 432166  | 27. 067121 |
| C  | 15. 621971 | 0. 890723  | 25. 750178 |
| C  | 16. 823380 | 1. 201166  | 25. 100775 |
| H  | 14. 550637 | 1. 089904  | 23. 070988 |
| H  | 14. 460493 | 6. 119019  | 24. 582255 |
| H  | 13. 210505 | 7. 937477  | 25. 715019 |
| H  | 14. 429866 | 9. 863958  | 26. 704430 |
| H  | 16. 911981 | 9. 954614  | 26. 572095 |
| H  | 18. 158880 | 8. 130972  | 25. 479443 |
| H  | 20. 211205 | 6. 587298  | 24. 497520 |
| H  | 21. 196825 | 4. 631095  | 28. 185010 |
| H  | 18. 939751 | 3. 580776  | 28. 230292 |
| H  | 17. 327601 | 4. 023747  | 26. 413117 |
| H  | 19. 095933 | 6. 987012  | 22. 725280 |
| H  | 20. 352278 | 3. 971480  | 23. 407360 |
| H  | 22. 758285 | 3. 648633  | 22. 909003 |
| H  | 23. 621970 | 4. 057400  | 20. 616997 |
| H  | 22. 100087 | 4. 816318  | 18. 824234 |
| H  | 20. 467275 | 5. 484463  | 17. 339178 |
| H  | 18. 547749 | 6. 296099  | 16. 010708 |
| H  | 16. 318586 | 6. 573659  | 17. 063490 |
| H  | 16. 000454 | 6. 036872  | 19. 481664 |

|   |            |            |            |
|---|------------|------------|------------|
| H | 17. 889467 | 1. 667481  | 19. 796381 |
| H | 18. 183460 | 0. 860650  | 17. 472052 |
| H | 16. 222135 | 0. 669507  | 15. 963427 |
| H | 13. 965681 | 1. 284969  | 16. 760223 |
| H | 19. 328974 | 2. 240216  | 21. 695778 |
| H | 21. 060944 | 0. 718469  | 20. 818244 |
| H | 20. 951712 | -1. 717124 | 21. 329444 |
| H | 19. 098771 | -2. 593638 | 22. 739055 |
| H | 18. 976681 | 0. 486893  | 27. 648083 |
| H | 16. 832454 | -0. 076042 | 28. 782301 |
| H | 14. 687137 | 0. 193717  | 27. 554207 |
| H | 14. 675575 | 1. 028074  | 25. 240682 |
| H | 15. 595982 | 0. 101352  | 21. 989596 |
| H | 11. 980226 | 1. 946532  | 17. 748672 |
| H | 10. 036014 | 2. 732494  | 19. 055141 |
| H | 10. 318371 | 3. 495080  | 21. 397880 |
| H | 12. 580488 | 3. 461969  | 22. 460203 |
| H | 17. 394103 | -1. 061896 | 23. 641180 |
| H | 18. 972855 | 1. 285923  | 25. 320340 |
